# Supplementary material for: A Repetitive DNA Element Regulates Expression of the Helicobacter pylori Sialic Acid Binding Adhesin by a Rheostat-like Mechanism
Source: PubMed Central journal article supplement (PMC4081817; doi:10.1371/journal.ppat.1004234), 2014-07-03
Supplement: ppat.1004234.s011.pdf [file ppat.1004234.s011.pdf]

**Table S1.** Length variations of repeat tracts of six relevant loci in different *Helicobacter* genomes.

| Strain name             | NCBI Ref Seq ID | <i>sabA</i> | <i>sabB</i> | <i>hopD</i> | <i>hofA</i> | <i>hopM*</i> | <i>hp_0350</i> |
|-------------------------|-----------------|-------------|-------------|-------------|-------------|--------------|----------------|
| <b>Genome sequences</b> |                 |             |             |             |             |              |                |
| 35A                     | NC_017360.1     | 15T         | -           | 14T         | 14T         | 13T          | 22A            |
| 51                      | NC_017382.1     | 14T         | -           | 14T         | 15T         | 16T          | 16A            |
| 52                      | NC_017354.1     | -           | 13T         | 15T         | 12T         | 14T          | 18A            |
| 83                      | NC_017375.1     | 17T         | -           | 13T         | 15T         | -            | 16A            |
| 908                     | NC_017357.1     | -           | -           | 13T         | 14T         | 14T,         | 18A            |
| 2017                    | NC_017374.1     | -           | -           | 18T         | 13T         | fragmented   | 14A            |
| 2018                    | NC_017381.1     | -           | -           | 15T         | 13T         | gene         | 18A            |
| 26695                   | NC_000915.1     | 14T         | 16T         | 15T         | 11T         | 14T          | 15A            |
| Aklavik86               | NC_019563.1     | -           | -           | 14T         | -           | 13T          | 15A            |
| Aklavik117              | NC_019560.1     | -           | -           | 18T         | 14T         | 16T          | 13A            |
| B8                      | NC_014256.1     | 20T         | -           | 15T         | 17T         | 14T          | 14A            |
| B38                     | NC_012973.1     | 14T         | -           | 15T         | 14T         | 14T          | 18A            |
| Cuz20                   | NC_017358.1     | 16T         | -           | 13T         | 13T         | 13T          | 15A            |
| ELS37                   | NC_017063.1     | 11T         | 12T         | 8T          | 12T         | 11T          | 15A            |
| F16                     | NC_017368.1     | 22T         | -           | 17T         | 13T         | 13T          | 15A            |
| F30                     | NC_017365.1     | 16T         | -           | 14T         | 10T         | 15T          | 13A            |
| F32                     | NC_017366.1     | 13T         | -           | 20T         | 16T         | 14T          | 18A            |
| F57                     | NC_017367.1     | 16T         | -           | 13T         | 14T         | 14T          | 15A            |
| G27                     | NC_011333.1     | 17T         | 15T         | 21T         | 16T         | 8T           | 18A            |
| Gambia9424              | NC_017371.1     | 12T         | -           | 18T         | 13T         | 13T          | 14A            |
| HPAG1                   | NC_008086.1     | 14T         | 13T         | 19T         | 18T         | 14T          | 14A            |
| HUP-B14                 | NC_017733.1     | -           | -           | 13T         | 17T         | 14T          | 15A            |
| India7                  | NC_017372.1     | 13T         | -           | 10T         | 16T         | 13T          | 14A            |
| J99                     | NC_000921.1     | 18T         | 10T         | 14T         | 15T         | 13T          | 17A            |
| Lithuania75             | NC_017362.1     | 14T         | 13T         | 15T         | 8T          | 11T          | 13A            |
| OK113                   | NC_020508.1     | 18T         | -           | 20T         | 10T         | 14T          | 19A            |
| OK310                   | NC_020509.1     | 14T         | -           | 15T         | 10T         | 14T          | 17A            |
| P12                     | NC_011498.1     | -           | 16T         | 18T         | 17T         | 14T          | 15A            |
| PeCan4                  | NC_014555.1     | 16T         | 13T         | 16T         | 17T         | 13T          | 15A            |
| PeCan18                 | NC_017742.1     | 12T         | 11T & 2C    | 12T         | 11T         | 11T          | 11A            |

Identical in all  
26695 genomes

**Table S1.** Length variations of repeat tracts of six relevant loci in different *Helicobacter* genomes.

| Strain name  | NCBI Ref Seq ID | <i>sabA</i> | <i>sabB</i> | <i>hopD</i> | <i>hofA</i> | <i>hopM*</i> | <i>hp_0350</i> |
|--------------|-----------------|-------------|-------------|-------------|-------------|--------------|----------------|
| Puno120      | NC_017378.1     | 12T         | -           | 13T         | 11T         | 11T          | 13A            |
| Puno135      | NC_017379.1     | 5T          | -           | 14T         | 15T         | 11T          | 14A            |
| Sat464       | NC_017359.1     | 14T         | -           | 16T         | 15T         | 12T          | 15A            |
| Shi112       | NC_017741.1     | 10T         | -           | 12T         | 16T         | 14T          | 16A            |
| Shi169       | NC_017740.1     | 14T         | -           | 18T         | 10T         | 12T          | 14A            |
| Shi417       | NC_017739.1     | 13T         | -           | 14T         | 17T         | 13T          | 12A            |
| Shi470       | NC_010698.2     | 15T         | -           | 13T         | 12T         | 11T          | 13A            |
| SJM180       | NC_014560.1     | 13T         | 15T         | 13T         | 14T         | 13T          | 14A            |
| SNT49        | NC_017376.1     | 12T         | 10T         | 18T         | 15T         | 14T          | 15A            |
| SouthAfrica7 | NC_017361.1     | 16T         | -           | 16T         | 14T         | 12T          | 14A            |
| UM032        | NC_021215.2     | 10T         | -           | 16T         | 13T         | 12T          | 15A            |
| UM037        | NC_021217.2     | 15T         | -           | 16T         | 15T         | 16T          | 11A            |
| UM066        | NC_021218.2     | 19T         | -           | 20T         | 17T         | 15T          | 13A            |
| UM299        | NC_021216.2     | 10T         | -           | 15T         | 13T         | 12T          | 16A            |
| v225d        | NC_017355.1     | 13T         | -           | 14T         | 9T          | 15T          | 16A            |
| XZ274        | NC_017926.1     | -           | 14T         | 11T         | 9T          | 12T          | 11A            |

**Sequencing of PCR products**

|            |                   |     |
|------------|-------------------|-----|
| B128       | NZ_ABSY00000000.1 | 17T |
| 98-10      | NZ_ABSX00000000.1 | 13T |
| SMI12      | na                | 18T |
| SMI52      | na                | 10T |
| SMI63      | na                | 15T |
| SMI66      | na                | 17T |
| SMI95      | na                | 12T |
| SMI100     | na                | 17T |
| SMI109     | KJ747959          | 13T |
| 17875 sLex | na                | 15T |
| 506        | na                | 20T |
| 508        | na                | 20T |
| GC20       | na                | 13T |
| GC21       | na                | 17T |

\* This locus contained variable open reading frames (orf) in the different strains due to homologous recombination of homologous genes. Marked in grey are locus that contain a different orf than abbreviated in 26695.

*hopM* locus (HP\_0227) contained *hopM* or *hopN* orfs

**Table S1.** Length variations of repeat tracts of six relevant loci in different *Helicobacter* genomes.

| Strain name                                    | NCBI Ref Seq ID | <i>sabA</i> | <i>sabB</i> | <i>hopD</i> | <i>hofA</i> | <i>hopM*</i> | <i>hp_0350</i> |
|------------------------------------------------|-----------------|-------------|-------------|-------------|-------------|--------------|----------------|
| <b>Other <i>Helicobacter</i> species</b>       |                 |             |             |             |             |              |                |
| <i>Helicobacter acinonychis</i> (cheetah)<br>* | NC_008229.1     | -           | -           | Similar 7T  | -           | -            | 15A            |
| <i>Helicobacter cetorum</i> (dolphin) #        | NC_017737.1     | -           | -           | -           | -           | -            | 15A and 2T     |
| <i>Helicobacter cetorum</i> (whale)            | NC_017735.1     | -           | -           | -           | -           | -            | -              |
| <i>Helicobacter felis</i> (cat)                | NC_014810.2     | -           | -           | -           | -           | -            | -              |
| <i>Helicobacter mustelae</i> (ferret)          | NC_013949.1     | -           | -           | -           | -           | -            | -              |

\* Eppinger M, Baar C, Linz B, Raddatz G, Lanz C et al. (2006). Who Ate Whom? Adaptive *Helicobacter* Genomic Changes That Accompanied a Host Jump from Early Humans to Large Felines. PLoS Genetics 2: e120

# Kersulyte D, Rossi M, Berg DE (2013). Sequence Divergence and Conservation in Genomes of *Helicobacter cetorum* Strains from a Dolphin and a Whale. PLoS One 8:e83177
