# Supplementary material for: A Repetitive DNA Element Regulates Expression of the Helicobacter pylori Sialic Acid Binding Adhesin by a Rheostat-like Mechanism
Source: PubMed Central journal article supplement (PMC4081817; doi:10.1371/journal.ppat.1004234), 2014-07-03
Supplement: ppat.1004234.s012.pdf [file ppat.1004234.s012.pdf]

**Table S2.** Oligonucleotides used in this study

| <b>Name</b>                                                                               | <b>Sequence (5' to 3')</b>                             |
|-------------------------------------------------------------------------------------------|--------------------------------------------------------|
| <b><i>lacZ</i> fusion constructions in <i>E. coli</i> and <i>H. pylori</i></b>            |                                                        |
| <i>sabA</i> -1                                                                            | ATGAATTCCTCTAGCAATGTGTGG                               |
| <i>sabA</i> -3                                                                            | ATGGATCCCTTTTTCATAAAAGTTCCTT                           |
| <i>sabA</i> -Tf*                                                                          | GGTTAAAATACTCCAAAATCTTTTTTTTTTTTTGGAAATCCAATAAAATT     |
| <i>sabA</i> -Tr*                                                                          | AATTTATTGGATTTCAAAAAAAAAAAAAGATTTTGGAGTATTTTAACC       |
| P163-P165*, P167*                                                                         | AAGATGATTTTATCGTTACTTTTTTTTTTTTTGGAAATCCAATAATTTATAGTA |
| P162                                                                                      | GTAACGATAAAATCATCTT                                    |
| <i>hypF</i> R                                                                             | GATCGTCGACGCCCCCTGTAACGAATA                            |
| <i>hypF</i> F                                                                             | GATCGGATCCGAAAGAATTTTCAGCCAT                           |
| <i>pyrGp</i> F                                                                            | GATCGTCGACGAAAGAATTTTCAGCCAT                           |
| <i>pyrGp</i> R                                                                            | GATCGGATCCGCCCCCTGTAACGAATA                            |
| <i>pyrG</i> 9Tf                                                                           | ACTGAAATTGTTTTTTTTGAAATCGCTT                           |
| <i>pyrG</i> 9Tf                                                                           | AAGCGATTTCAAAAAAAAAACAATTTTCAGT                        |
| Amut1-1F                                                                                  | GCTTCACAGATACATAGTTACAGTACTC                           |
| Amut1-1R                                                                                  | GAGTACTGTAACCTATGTATCTGTGAAGC                          |
| Amut1-2F                                                                                  | TTATCGTTACACAGATCAACGCTTCACA                           |
| Amut1-2R                                                                                  | TGTGAAGCGTTGATCTGTGTAACGATAA                           |
| Amut2-1F                                                                                  | CTGATGATACAGTTCACAGGATGATTTTA                          |
| Amut2-1R                                                                                  | TAAAATCATCCTGTGAACTGTATCATCAG                          |
| Amut2-2F                                                                                  | GCTTTATTCCATTACATACTGATGATAC                           |
| Amut2-2R                                                                                  | GTATCATCAGTATGTAATGGGAATAAAGC                          |
| <b>SM1109Δ<i>sabA</i>::<i>rpsLCAT</i> and T-variant constructions in <i>H. pylori</i></b> |                                                        |
| LA-F                                                                                      | AACCCCAAGCCCTCAAGATT                                   |
| LA-R                                                                                      | GTGTTTAATCCATAGTTATAAAGCATCCTAAAACAAGAACGCATA          |
| RA-F                                                                                      | CCCAGTTTGTGCGACTGATAAATGAAAAAGACAATTTTACTCT            |
| RA-R                                                                                      | GGCAGTTGTCTATAATCGTTCTAA                               |
| <i>rpsLCAT</i> -F                                                                         | TTTGTGAGCTATGCGTTCCTGTTTTAGGATGCTTTATAACTATGGATT       |
| <i>rpsLCAT</i> -R                                                                         | AGAGTAAAATTGTCTTTTTTCATTTATCAGTGCGACAAACT              |
| P93                                                                                       | AACCCCAAGCCCTCAAGATT                                   |
| P96                                                                                       | GGCAGTTGTCTATAATCGTTCTAA                               |
| <b><i>hup</i> and <i>napA</i> deletion/insertion constructions</b>                        |                                                        |
| <i>hup</i> -1                                                                             | CCCTTACCAAGCGATGGTGGGA                                 |
| <i>hup</i> -2                                                                             | TAGTGAAAAGTGTATTACGCCACGC                              |
| <i>hup</i> -3Km                                                                           | ACACAATCGCTCAAGACGTGTTCCGCTTTGTTTCATGTGG               |
| <i>hup</i> -4Km                                                                           | CTAATTCATGTCAGCCGTGAGTGCCTAAATTCAAAACCC                |
| <i>hup</i> -5                                                                             | GGGATTTTAATGGCTTGATTGTATCG                             |
| <i>hup</i> -in                                                                            | CTCTTTTGTGTTGTATTTACCCGC                               |
| <i>napA</i> 1F                                                                            | TTGATAATGGCAAGGAAGTGGA                                 |
| <i>napA</i> 1R                                                                            | TCAAGCCATAGCCGATAAGCT                                  |
| <i>napA</i> 2F                                                                            | CACGATCGCATCCGCTTGCA                                   |
| <i>napA</i> 2R                                                                            | TTACCGTAACTTATGCGGACGAT                                |
| <i>Kmup</i>                                                                               | CACGTCTTGAGCGATTGTGTAGG                                |
| <i>Kmdn</i>                                                                               | ACGGCTGACATGGGAATTAGCCA                                |
| <i>Km2</i>                                                                                | CGATTGTCTGTTGTGCC                                      |

\* Different variants of *sabA*-Tf and -Tr primers that harbor different length of the T tract were used. Here is one representative variant shown.

**Table S2.** Oligonucleotides used in this study

| <b>Name</b>                                          | <b>Sequence (5' to 3')</b>      |
|------------------------------------------------------|---------------------------------|
| <b>5' RACE and Primer extension</b>                  |                                 |
| AB35                                                 | GATTGGGTGGTGGCTGTTGTAGTTG       |
| J99-8                                                | GTTGTCTTCAGCGTGCAAGAGCG         |
| <i>sabA</i> -8                                       | CTTTTTCATAAAAAGTGTTCCTT         |
| <b>Sequencing <i>sabA</i> promoter</b>               |                                 |
| CL1                                                  | GCAATGTGTGGCAGCAAC              |
| CL2                                                  | CTAGCGGGTTTTGAGTATC             |
| P67                                                  | TGGGTGGTGGCTGTTGTAGTTGTT        |
| P68                                                  | CATTTTCATGGCGTTTGGTTTG          |
| <b>EMSA, Footprint and Surface plasmon resonance</b> |                                 |
| <i>sabA</i> -5                                       | CGTTCTTGTTTTAGTTTGGC            |
| Biotin- <i>sabA</i> -5                               | Biotin-CGTTCTTGTTTTAGTTTGGC     |
| <i>sabA</i> -8                                       | CTTTTTCATAAAAAGTGTTCCTT         |
| <b>FLA analysis – FAM primers</b>                    |                                 |
| FAM-F                                                | TATGCGTTCCTGTTTTAGTTT           |
| FAM-Rlong                                            | CTTTTTCATAAAAATGTTCCCTTAAAGTAAT |
| FAM-Rshort                                           | ATTACTTTAAGGAACATTTTATGAAAAAG   |
| <b>qPCR analysis</b>                                 |                                 |
| <i>sabA</i> -qP1F                                    | TGAACGAAAAATACGAGCAA            |
| <i>sabA</i> -qP1R                                    | CCGCATAAAGACTCCAAAA             |
| <i>sabA</i> -qP2F                                    | TTCGGTATTGGGTTTTTGGAG           |
| <i>sabA</i> -qP2R                                    | GCTTTAGTGGTAGCGTTTTGT           |
| <i>rrnA</i> -2F                                      | CTCCCTACGGGGGAAAGATT            |
| <i>rrnA</i> -2R                                      | GTAGGAGTCTGGACCGTGTC            |
| <i>ppk</i> -2F                                       | GCAAACCCAAAAAGGGAGTCA           |
| <i>ppk</i> -2R                                       | TGACCAATCCCACAAATCCC            |
| <i>gyrA</i> -1F                                      | GCTAGGATCGTGGGTGATGT            |
| <i>gyrA</i> -1R                                      | TGGCTTCAGTGTAAACGCATC           |
